# Supplementary figures and images for: Human Medial Forebrain Bundle (MFB) and Anterior Thalamic Radiation (ATR): Imaging of Two Major Subcortical Pathways and the Dynamic Balance of Opposite Affects in Understanding Depression
Source: Atypon-hosted journal article supplement (doi:10.1176/appi.neuropsych.11080180), 2012-04-01

Supplemental figure 1:

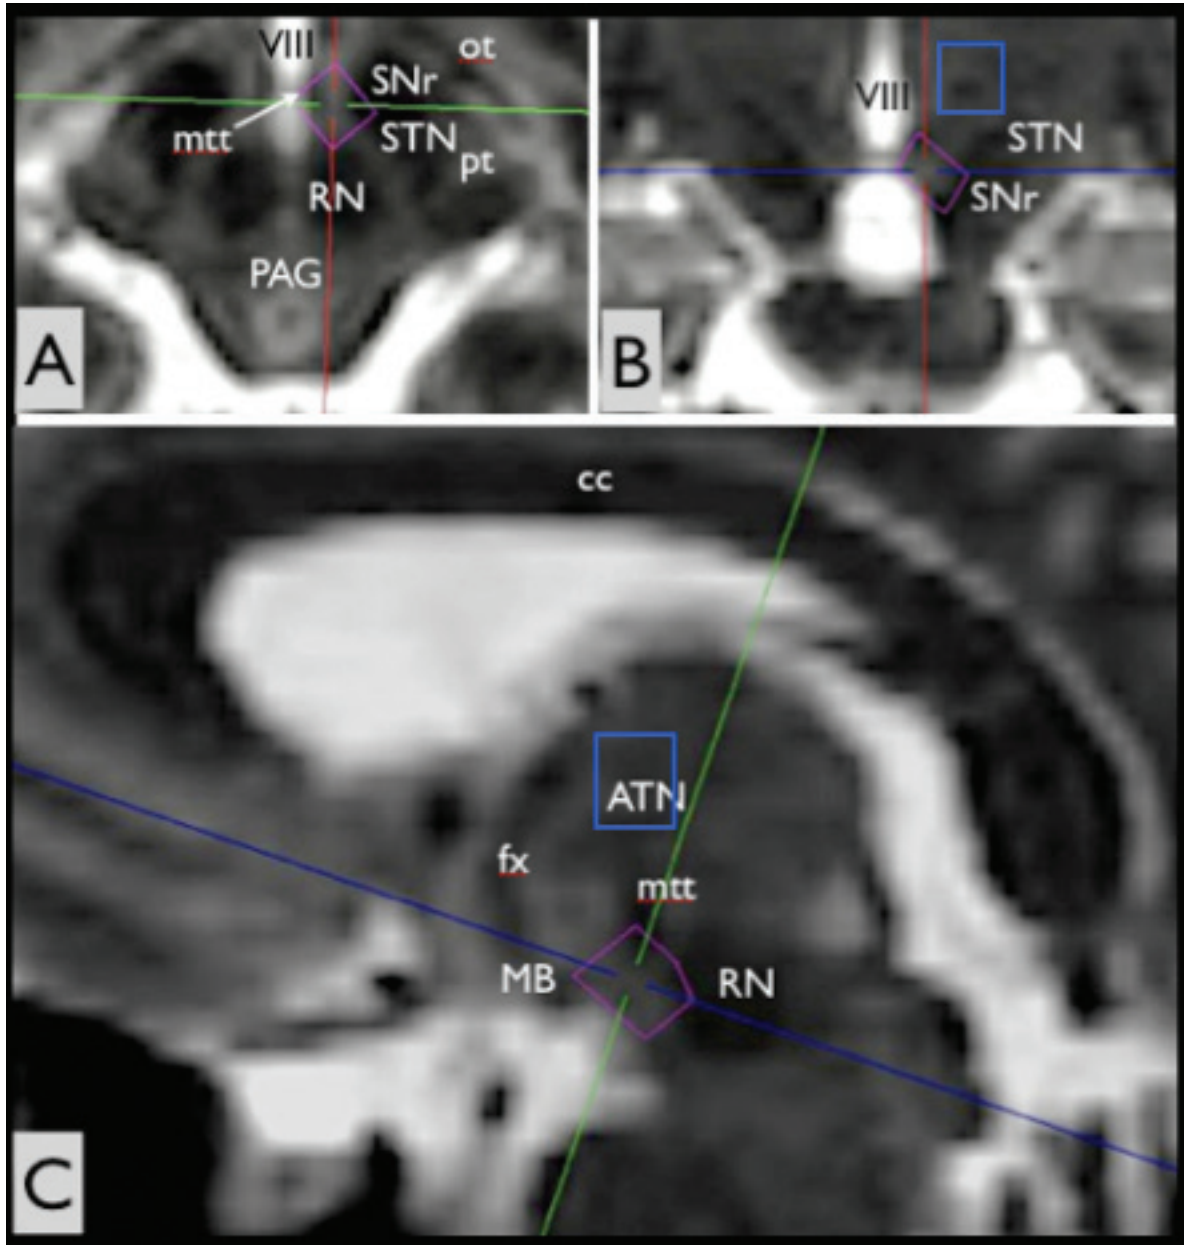

Supplemental figure 2:

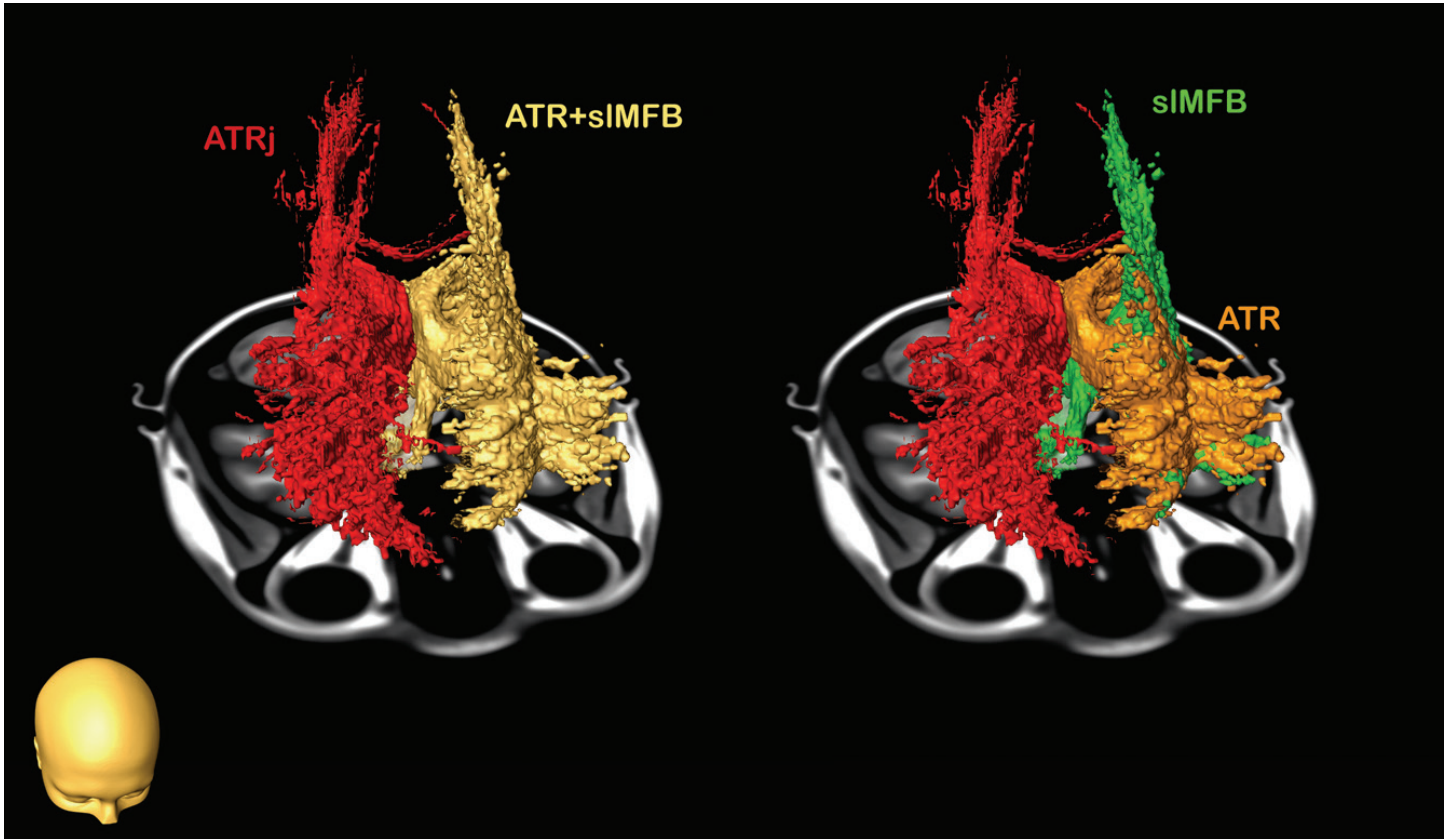

Supplement: jn-11080180_ds001.pdf [file jn-11080180_ds001.pdf]
